# Supplementary material for: Initial Effects of Differently Treated Biogas Residues from Municipal and Industrial Wastes on Spring Barley Yield Formation
Source: PLoS One. 2016 Apr 26;11(4):e0154232. doi: 10.1371/journal.pone.0154232 (PMC4846027; doi:10.1371/journal.pone.0154232)
Supplement: S1 Table — Temporal sequence of mineral nitrogen (Nmin) in soil (0-20cm depth) during the vegetation period in plots fertilized with a) L1 = liquid fraction of BGR from biogas plant 1 and S1 = solid fraction of BGR from biogas plant 1 and b) with L2 = liquid fraction of BGR from biogas plant 2 and S2 = solid fraction of BGR from biogas plant 2. (XLSX) [file pone.0154232.s001.xlsx]

## Sheet: Nmin
S1 Table: Temporal sequence of mineral nitrogen (Nmin) in soil (0-20cm depth) during the vegetation period in plots fertilized with a) L1 = liquid fraction of BGR from biogas plant 1 and S1 = solid fraction of BGR from biogas plant 1 and b) with L2 = liquid fraction of BGR from biogas plant 2 and S2 = solid fraction of BGR from biogas plant 2
	L1 mean	L1 sd	S1 mean	S2 sd	L2 mean	L2 sd	S2 mean	S2 sd
04.04.2011	19.18	5.54778	18.455	5.53986	26.31	4.28528	21.57	-
2011-04-12	76.215	45.2053	22.48	7.1271	27.795	18.7928	25.495	2.75516
2011-04-29	50.36	10.9772	25.32	5.33593	40.245	0.339411	26.48	6.33848
2011-05-18	38.305	15.2204	12.945	0.360624	22.18	5.37966	18.12	10.1628
2011-06-10	5.835	0.106066	4.775	1.16154	4.85	2.67935	4.255	1.37905
2011-07-04	4.73	0.742816	5.935	0.789794	7.155	3.41806	6.0975	0.0106066
2011-07-26	5.79	0.106066	8.3475	0.0106066	8.4525	0.180312	7.635	3.85675
sd	standard deviation
mean	mean value of three samples
Method: Inorganic N (Nmin) was calculated as the sum of NH4-N and NO3-N. Ammonium N and N03-N concentrations in soil samples were measured photometrically (MERCK SQ 118).
By questions contact: nadia.prays@ufz.de
